# Supplementary material
Source: PubMed Central journal article supplement (PMC9504582)
Supplement: NIHMS1627561-supplement-Supplementary_Table.pdf [file NIHMS1627561-supplement-Supplementary_Table.pdf]

**Supplementary Table: Differences between true positive results in the pelvis and retroperitoneum**

|                                 | <b>Pelvis</b> | <b>Retroperitoneum</b> | <b>p value</b> |
|---------------------------------|---------------|------------------------|----------------|
| <b>Pathology, LAD (mm)</b>      | 12            | 11.5                   | 0.3            |
| <b>Pathology, SAD (mm)</b>      | 6             | 8                      | 0.2            |
| <b>Tumor size, LAD (mm)</b>     | 10            | 11.5                   | 0.1            |
| <b>Tumor size, SAD (mm)</b>     | 5             | 7.5                    | 0.2            |
| <b>Extranodal extension (%)</b> | 85            | 93                     | 0.4            |
| <b>PET/CT, LAD (mm)</b>         | 10            | 9                      | 0.5            |
| <b>PET/CT, SAD (mm)</b>         | 8             | 8                      | 0.8            |
| <b>SUV</b>                      | 3             | 3.6                    | 0.5            |
